# Supplementary material for: A dual-response drug delivery system with X-ray and ROS to boost the anti-tumor efficiency of TPZ via enhancement of tumor hypoxia levels
Source: Royal Society of Chemistry journal article supplement (doi:10.1039/d2nr04021b), 2022-11-04
Supplement: d2nr04021b1.pdf [file d2nr04021b1.pdf]

## Supporting Information for

# A Dual-response Drug Delivery System with X-ray and ROS to Boost the Anti-Tumor Efficiency of TPZ via Enhancement of Tumor Hypoxia Level

Panli Han,<sup>1,2</sup> Lianxue Zhang,<sup>2\*</sup> Yaqi Fu,<sup>2</sup> Youyu Fu,<sup>2</sup> Jianxiang Huang,<sup>2</sup> Jinlin He,<sup>3</sup>  
Peihong Ni,<sup>3</sup> Taimoor Khan,<sup>2</sup> Yang Jiao,<sup>1</sup> Zaixing Yang,<sup>1,2</sup> and Ruhong Zhou<sup>2,4\*</sup>

1. State Key Laboratory of Radiation Medicine and Protection, School for Radiological and Interdisciplinary Sciences (RAD-X), Soochow University, Suzhou 215123, China

2. Institute of Quantitative Biology, Shanghai Institute for Advanced Study, College of Life Sciences, Zhejiang University, Hangzhou 310027, China

3. College of Chemistry, Chemical Engineering and Materials Science, State and Local Joint Engineering Laboratory for Novel Functional Polymeric Materials, Soochow University, Suzhou 215123, China

4. Cancer Center, Zhejiang University, Hangzhou 310058, China

5. Department of Chemistry, Columbia University, New York, New York 10027, United States

\*Corresponding authors: [lianxuezhang@zju.edu.cn](mailto:lianxuezhang@zju.edu.cn) (L. Zhang); [rhzhou@zju.edu.cn](mailto:rhzhou@zju.edu.cn) (R. Zhou)

## 1. Synthesis procedures.

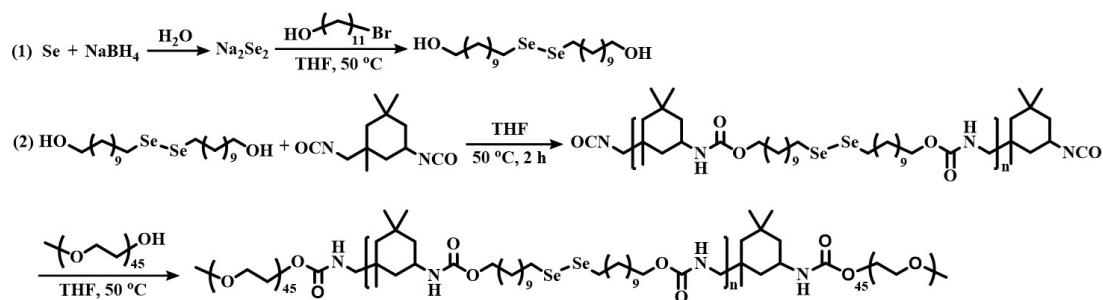

**Figure S1.** The synthesis routes of di(1-hydroxyundecyl) diselenide and PEG-PUseSe-PEG (Se-polymer) block copolymer.

### 1.1 Synthesis of di(1-hydroxyundecyl) diselenide.

Firstly, Sodium borohydride (1.0 g, 26.4 mmol) was dissolved in 10 mL water and slowly added to selenium powder (1.0 g, 12.6 mmol) suspended in 15 mL water under  $\text{N}_2$  flow at room temperature. Secondly, 1.0 g selenium powder was added after 10 minutes of reaction. The solution was stirred for 15 min and warmed by the steam bath to 50 °C. Next, 11-bromoethanol (6.33 g, 25.2 mmol) dissolved in 25 mL anhydrous THF was slowly added into it. The reaction was performed at 50 °C for 24 h and the reaction solution was extracted three times by  $\text{CH}_2\text{Cl}_2$  and dried with anhydrous  $\text{Na}_2\text{SO}_4$  for 12 h. Then, the product was steamed by evaporator to remove the solvent and purified by column chromatography with  $\text{CH}_2\text{Cl}_2$  and ethyl acetate (volume ratio: 4:1) as eluent. A yellow transparent liquid was obtained. Finally, the liquid was steamed by evaporator to obtain di(1-hydroxyundecyl) diselenide ( $\text{HOC}_{11}\text{SeSeC}_{11}\text{OH}$ ).  $^1\text{H-NMR}$  (300 MHz,  $\text{CDCl}_3$ ,  $\delta$ ) (ppm): 3.63 (4H, t,  $\text{HOCH}_2$ ), 2.90 (4H, t,  $\text{SeSeCH}_2$ ) 1.72-1.28 (36H, m,  $\text{HOCH}_2(\text{CH}_2)_9\text{CH}_2\text{SeSe}$ ); LC-MS: calculated 500.53, found 500.16.

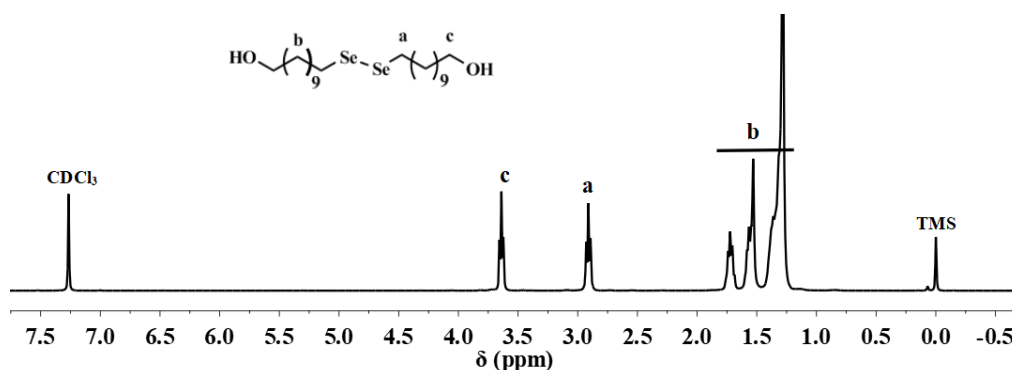

**Figure S2.**  $^1\text{H}$  NMR spectrum of di(1-hydroxylundecyl) diselenide in  $\text{CDCl}_3$ .

### 1.2 Synthesis of PEG-PUSESe-PEG (Se-polymer) block copolymer.

Firstly, the anhydrous flask was degassed by  $\text{N}_2$  for 20 min. Secondly, 0.2 g  $\text{HOC}_{11}\text{SeSeC}_{11}\text{OH}$  (0.40 mmol), 10 mg of dibutyltin dilaurate (DBTDL) (0.016 mmol) and 3 mL of anhydrous tetrahydrofuran (THF) were added into the flask. Next, a solution of isophorone diisocyanate (IPDI) (97.8 mg, 0.44 mmol) was injected into the flask. Then, the sealed flask was transferred into an oil bath at  $50\text{ }^\circ\text{C}$  and reacted for 2 h. 1.3 g mPEG2000 (0.65 mmol) dissolved in 2 mL of anhydrous THF was injected into the flask and carried out for 12 h. The final solvent was concentrated by rotary evaporation. The residual viscous solvent was dropped in cold methanol thrice. Finally, the powder of amphiphilic diselenium-inserted copolymer (Se-polymer) was obtained after vacuum drying at room temperature (0.76 g, yield: 45%).

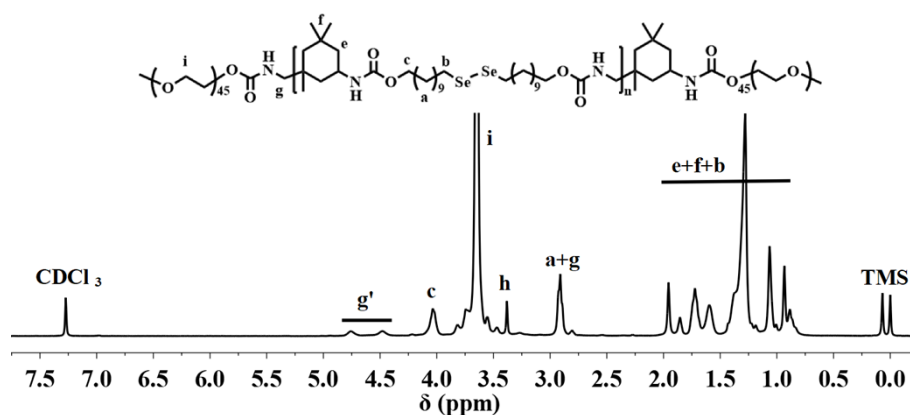

**Figure S3.**  $^1\text{H}$  NMR spectrum of Se-polymer in  $\text{CDCl}_3$ .

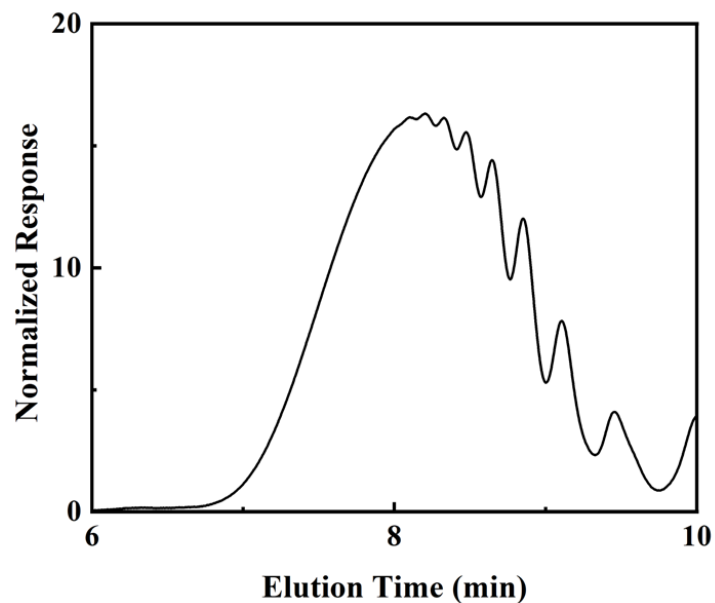

**Figure S4.** GPC plot of Se-polymer in DMF.

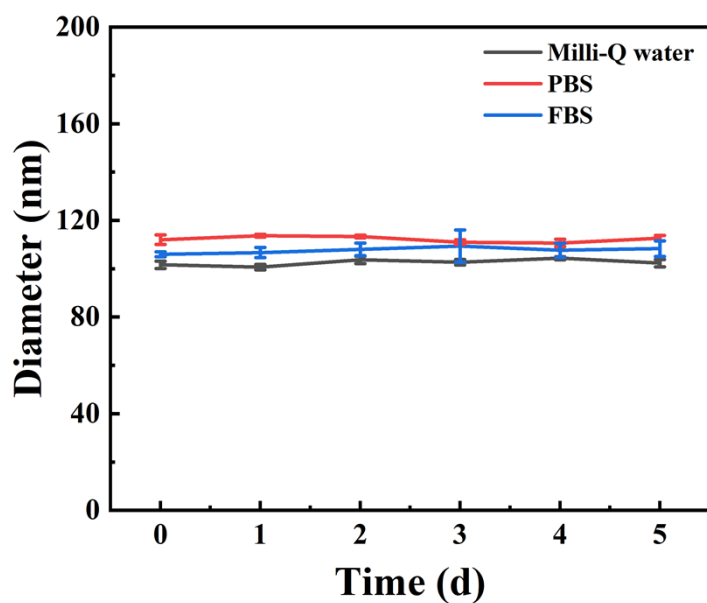

**Figure S5.** Particle size change of P-NPs at different incubation times and in three different media: Milli-Q water, PBS, and FBS (10%).

## 2. The stability of Nile red (NR) under H<sub>2</sub>O<sub>2</sub> and X-ray irradiation condition.

The stability of the NR (THF: H<sub>2</sub>O = 4: 1, 0.1 mg/mL) was tested under five different experimental conditions by fluorometer: (a) control, (b) 10 Gy X-ray, (c) 20

Gy X-ray, (d) 100  $\mu\text{M}$   $\text{H}_2\text{O}_2$ , (e) 10 Gy X-ray and 100  $\mu\text{M}$   $\text{H}_2\text{O}_2$ . The experiments were carried out in three repeats.

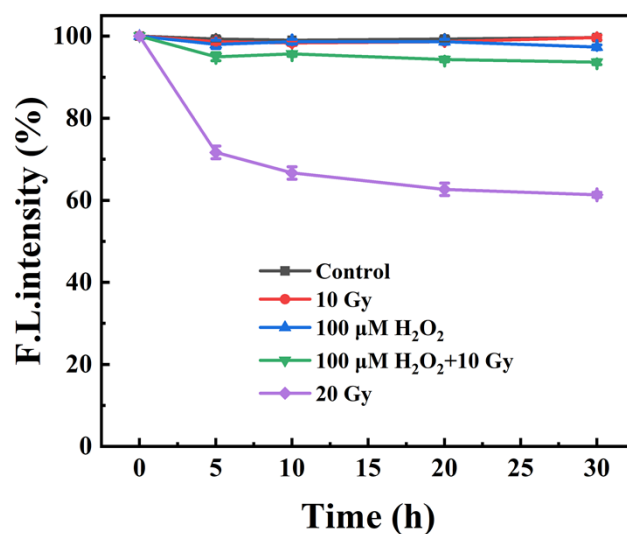

**Figure S6.** The fluorescence intensity of NR under different conditions.

### 3. Size distribution of PTX-loaded NPs (P-NPs) and DOX-loaded NPs (D-NPs).

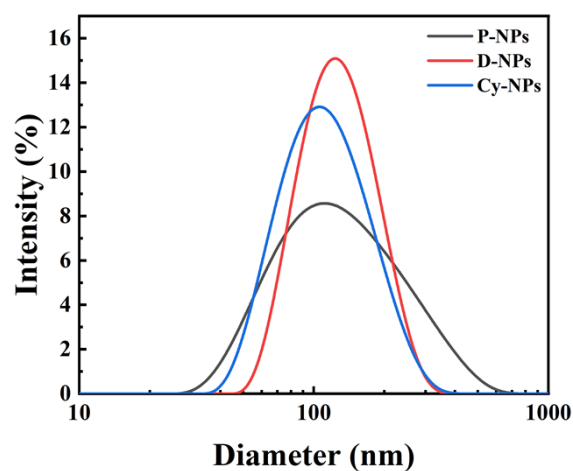

**Figure S7.** Size distribution of P-NPs, Cy-NPs and D-NPs.

**Table S1.** Liver and kidney functional marker test.

| Control | P-NPs | F-PTX |
|---------|-------|-------|
|---------|-------|-------|

---

|               |                |                |                |
|---------------|----------------|----------------|----------------|
| ALT (U/L)     | 43.37 ± 2.83   | 43.87 ± 5.97   | 46.73 ± 4.27   |
| AST (U/L)     | 139.01 ± 18.24 | 126.40 ± 11.16 | 159.17 ± 17.17 |
| ALP (U/L)     | 152.33 ± 12.12 | 144.67 ± 13.25 | 169.01 ± 13.53 |
| Bun (mmol/L)  | 6.37 ± 0.67    | 6.83 ± 0.55    | 8.73 ± 0.78    |
| CREA (μmol/L) | 16.33 ± 1.89   | 16.67 ± 1.06   | 17.67 ± 1.15   |
